# Supplementary material
Source: Springer Nature journal article supplement (https://www.springermedizin.de/resource/supplementary/12889_2011_3426_MOESM3_ESM.pdf/9489028)

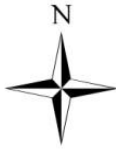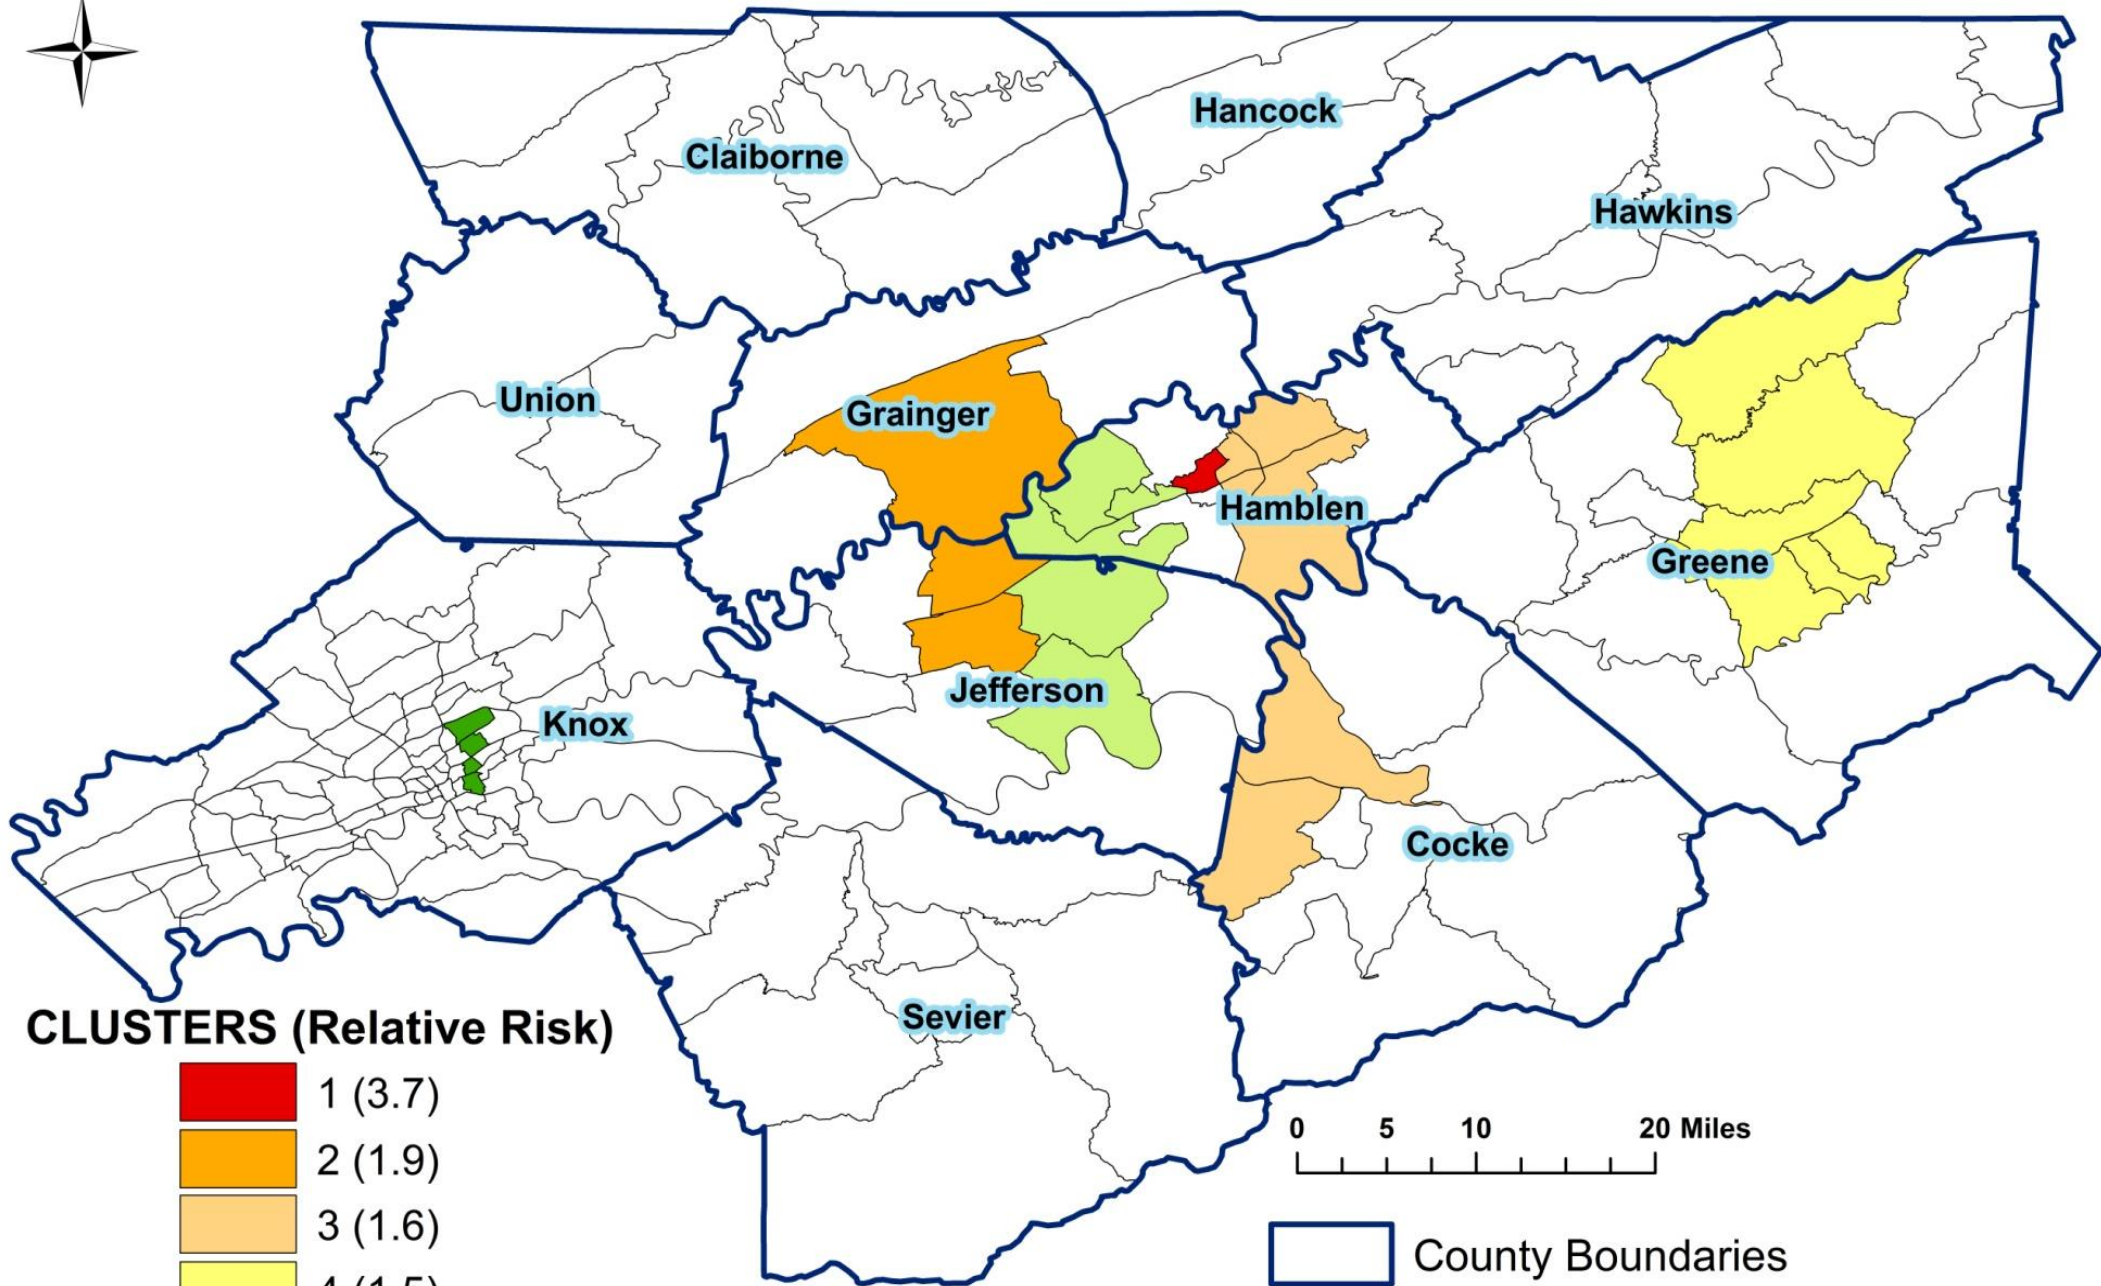

**CLUSTERS (Relative Risk)**

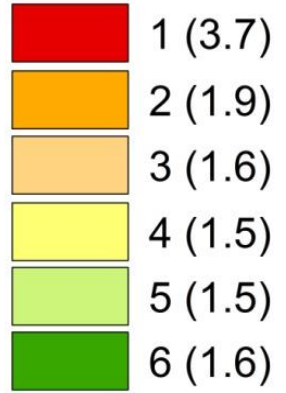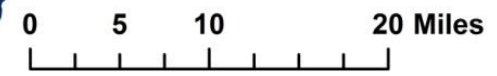

-  County Boundaries
-  Census Tract Boundaries

Supplement: MOESM3 [file 9489028]
